# Supplementary material for: Effects of Endogenous Signals and Fusarium oxysporum on the Mechanism Regulating Genistein Synthesis and Accumulation in Yellow Lupine and Their Impact on Plant Cell Cytoskeleton
Source: PubMed Central journal article supplement (PMC6271453; doi:10.3390/molecules190913392), 2014-08-29
Supplement: molecules-19-13392-s001.pdf [file molecules-19-13392-s001.pdf]

## Supplementary Materials

Statistical significance of differences between the average values of each pairs for accumulation of genistein and other isoflavones. Statistically significant differences ( $p$ -value) was assumed at  $p < 0.05$ .

### Genistein

| Time (h)  | Contrast | Value of Contrast | $p$ -Value | Time (h)  | Value of Contrast | $p$ -Value |
|-----------|----------|-------------------|------------|-----------|-------------------|------------|
| <b>0</b>  | 0n:0i    | -0.0473           | 0.033      |           |                   |            |
|           | +Sn:+Si  | 0.1033            | 0.101      |           | -0.1270           | 0.106      |
|           | +Gn:+Gi  | -0.2893           | 0.010      |           | -0.2417           | 0.012      |
|           | +Fn:+Fi  | 0.0486            | 0.395      |           | -0.6283           | <0.001     |
| <b>24</b> | -Sn:-Si  | -0.0706           | 0.047      | <b>72</b> | -0.2017           | 0.009      |
|           | +Si:-Si  | 0.0330            | 0.289      |           | 0.2020            | 0.026      |
|           | +Gi:-Si  | 0.2640            | 0.014      |           | 0.1110            | 0.150      |
|           | +Fi:-Si  | 0.00006           | 0.999      |           | 0.4007            | 0.002      |
|           | +Sn:+Si  | -0.1833           | 0.031      |           | -1.478            | <0.001     |
|           | +Gn:+Gi  | -0.3913           | <0.001     |           | -0.9520           | <0.001     |
|           | +Fn:+Fi  | -0.2333           | 0.029      |           | -1.103            | 0.019      |
| <b>48</b> | -Sn:-Si  | -0.6420           | <0.001     | <b>96</b> | -0.1153           | 0.172      |
|           | +Si:-Si  | -0.4627           | 0.005      |           | 1.490             | <0.001     |
|           | +Gi:-Si  | -0.1460           | 0.086      |           | 0.8577            | 0.002      |
|           | +Fi:-Si  | -0.3877           | 0.014      |           | 0.9517            | 0.004      |

### 2'-Hydroxygenistein

| Time (h)  | Contrast | Value of Contrast | $p$ -Value | Time (h)  | Value of Contrast | $p$ -Value |
|-----------|----------|-------------------|------------|-----------|-------------------|------------|
| <b>0</b>  | 0n:0i    | 0.0533            | 0.022      |           |                   |            |
|           | +Sn:+Si  | 0.0120            | 0.840      |           | 0.9657            | <0.001     |
|           | +Gn:+Gi  | -0.2523           | <0.001     |           | 1.749             | <0.001     |
|           | +Fn:+Fi  | 0.3080            | <0.001     |           | 1.282             | <0.001     |
| <b>24</b> | -Sn:-Si  | -0.0663           | 0.163      | <b>72</b> | 0.0133            | 0.106      |
|           | +Si:-Si  | 0.1370            | 0.049      |           | 0.2887            | <0.001     |
|           | +Gi:-Si  | 0.2147            | 0.006      |           | 0.1607            | 0.044      |
|           | +Fi:-Si  | -0.0043           | 0.924      |           | 0.0433            | 0.034      |
|           | +Sn:+Si  | 1.165             | <0.001     |           | 1.543             | <0.001     |
|           | +Gn:+Gi  | 1.325             | 0.007      |           | 0.5640            | <0.001     |
|           | +Fn:+Fi  | 1.219             | 0.003      |           | 0.9840            | <0.001     |
| <b>48</b> | -Sn:-Si  | 0.0833            | <0.001     | <b>96</b> | 0.0986            | <0.001     |
|           | +Si:-Si  | 0.2460            | 0.013      |           | 0.2210            | 0.013      |
|           | +Gi:-Si  | 0.1010            | <0.001     |           | 0.2590            | <0.001     |
|           | +Fi:-Si  | 0.0860            | <0.001     |           | 0.1540            | 0.031      |

**Wighteon**

| Time (h)  | Contrast | Value of Contrast | <i>p</i> -Value | Time (h)  | Value of Contrast | <i>p</i> -Value |
|-----------|----------|-------------------|-----------------|-----------|-------------------|-----------------|
| <b>0</b>  | 0n:0i    | -0.0272           | 0.038           |           |                   |                 |
|           | +Sn:+Si  | -0.3823           | <0.001          |           | 1.121             | <0.001          |
|           | +Gn:+Gi  | -0.2583           | <0.001          |           | 1.255             | <0.001          |
|           | +Fn:+Fi  | -0.4880           | <0.001          |           | -0.4727           | <0.001          |
| <b>24</b> | -Sn:-Si  | -0.2910           | <0.001          | <b>72</b> | 0.0103            | 0.691           |
|           | +Si:-Si  | 0.1947            | 0.002           |           | 0.5460            | <0.001          |
|           | +Gi:-Si  | -0.0736           | 0.004           |           | 0.5170            | <0.001          |
|           | +Fi:-Si  | 0.2277            | 0.018           |           | 0.7720            | <0.001          |
|           | +Sn:+Si  | -0.7563           | <0.001          |           | 0.7067            | <0.001          |
|           | +Gn:+Gi  | -1.298            | <0.001          |           | 1.684             | <0.001          |
|           | +Fn:+Fi  | -0.0066           | 0.678           |           | 1.315             | <0.001          |
| <b>48</b> | -Sn:-Si  | 0.0413            | 0.419           | <b>96</b> | 0.1980            | 0.006           |
|           | +Si:-Si  | 0.7147            | <0.001          |           | 0.3933            | 0.003           |
|           | +Gi:-Si  | 1.323             | <0.001          |           | 0.2870            | 0.001           |
|           | +Fi:-Si  | 0.3567            | <0.001          |           | 0.1707            | 0.002           |

**Luteon**

| Time (h)  | Contrast | Value of Contrast | <i>p</i> -Value | Time (h)  | Value of Contrast | <i>p</i> -Value |
|-----------|----------|-------------------|-----------------|-----------|-------------------|-----------------|
| <b>0</b>  | 0n:0i    | 0.0310            | 0.041           |           |                   |                 |
|           | +Sn:+Si  | -0.2467           | <0.001          |           | -0.4324           | <0.001          |
|           | +Gn:+Gi  | -0.5930           | <0.001          |           | -0.5050           | 0.001           |
|           | +Fn:+Fi  | -0.4550           | <0.001          |           | -1.446            | <0.001          |
| <b>24</b> | -Sn:-Si  | -0.3887           | <0.001          | <b>72</b> | -0.4323           | <0.001          |
|           | +Si:-Si  | 0.0996            | 0.009           |           | 0.4427            | 0.002           |
|           | +Gi:-Si  | 0.1103            | 0.007           |           | 0.6590            | <0.001          |
|           | +Fi:-Si  | 0.1303            | 0.010           |           | 1.126             | <0.001          |
|           | +Sn:+Si  | -0.8723           | <0.001          |           | -1.290            | <0.001          |
|           | +Gn:+Gi  | -1.701            | <0.001          |           | -0.6073           | <0.001          |
|           | +Fn:+Fi  | -0.5290           | <0.001          |           | -0.2763           | 0.001           |
| <b>48</b> | -Sn:-Si  | -0.2123           | 0.001           | <b>96</b> | 0.5250            | <0.001          |
|           | +Si:-Si  | 0.7347            | <0.001          |           | 1.794             | <0.001          |
|           | +Gi:-Si  | 1.441             | <0.001          |           | 1.139             | <0.001          |
|           | +Fi:-Si  | 0.4437            | <0.001          |           | 0.8910            | <0.001          |

Statistical significance of differences between the average values of each pairs for expression levels of isoflavone biosynthetic pathway genes. Statistically significant differences (*p*-value) was assumed at  $p < 0.05$ .

## PAL

| Time (h)  | Contrast | Value of Contrast | <i>p</i> -Value | Time (h)  | Value of Contrast | <i>p</i> -Value |
|-----------|----------|-------------------|-----------------|-----------|-------------------|-----------------|
| <b>0</b>  | 0n:0i    | -0.064            | 0.108           |           |                   |                 |
|           | +Sn:+Si  | 0.1590            | 0.028           |           | -1.475            | <0.001          |
|           | +Gn:+Gi  | -0.3607           | <0.001          |           | -1.552            | <0.001          |
|           | +Fn:+Fi  | -0.1913           | 0.001           |           | -0.786            | <0.001          |
| <b>24</b> | -Sn:-Si  | -0.9157           | <0.001          | <b>72</b> | -2.231            | <0.001          |
|           | +Si:-Si  | -0.4617           | <0.001          |           | -0.694            | <0.001          |
|           | +Gi:-Si  | 0.0106            | 0.757           |           | -0.354            | <0.001          |
|           | +Fi:-Si  | -0.3613           | <0.001          |           | -1.249            | <0.001          |
|           | +Sn:+Si  | -0.6617           | <0.001          |           | -1.869            | <0.001          |
|           | +Gn:+Gi  | -0.6737           | <0.001          |           | -0.824            | <0.001          |
|           | +Fn:+Fi  | -0.3940           | <0.001          |           | -4.280            | <0.001          |
| <b>48</b> | -Sn:-Si  | -0.6370           | <0.001          | <b>96</b> | 0.517             | 0.002           |
|           | +Si:-Si  | 0.3623            | <0.001          |           | 2.561             | <0.001          |
|           | +Gi:-Si  | 0.4097            | <0.001          |           | 2.209             | 0.002           |
|           | +Fi:-Si  | 0.2067            | 0.004           |           | 5.033             | <0.001          |

## CHS

| Time (h)  | Contrast | Value of Contrast | <i>p</i> -Value | Time (h)  | Value of Contrast | <i>p</i> -Value |
|-----------|----------|-------------------|-----------------|-----------|-------------------|-----------------|
| <b>0</b>  | 0n:0i    | -1.116            | <0.001          |           |                   |                 |
|           | +Sn:+Si  | -1.652            | <0.001          |           | -4.289            | <0.001          |
|           | +Gn:+Gi  | -2.040            | <0.001          |           | -3.911            | <0.001          |
|           | +Fn:+Fi  | -2.240            | <0.001          |           | -3.029            | <0.001          |
| <b>24</b> | -Sn:-Si  | -2.549            | <0.001          | <b>72</b> | -8.179            | <0.001          |
|           | +Si:-Si  | 0.068             | 0.699           |           | -3.405            | <0.001          |
|           | +Gi:-Si  | 0.339             | 0.168           |           | -3.497            | <0.001          |
|           | +Fi:-Si  | 0.325             | 0.198           |           | -4.761            | <0.001          |
|           | +Sn:+Si  | -2.176            | <0.001          |           | -7.276            | <0.001          |
|           | +Gn:+Gi  | -2.202            | <0.001          |           | -4.210            | <0.001          |
|           | +Fn:+Fi  | -2.953            | <0.001          |           | -8.054            | <0.001          |
| <b>48</b> | -Sn:-Si  | -2.985            | <0.001          | <b>96</b> | 0.129             | 0.004           |
|           | +Si:-Si  | 0.367             | 0.027           |           | 7.798             | <0.001          |
|           | +Gi:-Si  | -0.150            | 0.241           |           | 5.290             | <0.001          |
|           | +Fi:-Si  | 0.584             | 0.010           |           | 8.679             | <0.001          |

## CHI

| Time (h)  | Contrast | Value of Contrast | <i>p</i> -Value | Time (h)  | Value of Contrast | <i>p</i> -Value |
|-----------|----------|-------------------|-----------------|-----------|-------------------|-----------------|
| <b>0</b>  | 0n:0i    | -0.188            | 0.003           |           |                   |                 |
|           | +Sn:+Si  | -0.580            | 0.040           |           | -1.024            | <0.001          |
|           | +Gn:+Gi  | -0.536            | 0.006           |           | -1.266            | <0.001          |
|           | +Fn:+Fi  | -0.574            | 0.002           |           | -0.568            | 0.004           |
| <b>24</b> | -Sn:-Si  | -0.962            | <0.001          | <b>72</b> | -1.572            | <0.001          |
|           | +Si:-Si  | -0.070            | 0.612           |           | -0.231            | 0.126           |
|           | +Gi:-Si  | -0.007            | 0.948           |           | 0.001             | 0.995           |
|           | +Fi:-Si  | -0.026            | 0.614           |           | -0.654            | 0.003           |
|           | +Sn:+Si  | -0.406            | 0.004           |           | -1.328            | <0.001          |
|           | +Gn:+Gi  | -0.650            | 0.009           |           | -0.717            | 0.001           |
|           | +Fn:+Fi  | -1.124            | <0.001          |           | -2.276            | <0.001          |
| <b>48</b> | -Sn:-Si  | -0.688            | <0.001          | <b>96</b> | 0.629             | 0.011           |
|           | +Si:-Si  | 0.362             | 0.013           |           | 2.179             | <0.001          |
|           | +Gi:-Si  | 0.306             | 0.008           |           | 1.889             | <0.001          |
|           | +Fi:-Si  | 0.574             | <0.001          |           | 3.328             | <0.001          |

## IFS

| Time (h)  | Contrast | Value of Contrast | <i>p</i> -Value | Time (h)  | Value of Contrast | <i>p</i> -Value |
|-----------|----------|-------------------|-----------------|-----------|-------------------|-----------------|
| <b>0</b>  | 0n:0i    | 1.916             | <0.001          |           |                   |                 |
|           | +Sn:+Si  | -1.087            | <0.001          |           | -2.685            | <0.001          |
|           | +Gn:+Gi  | -1.706            | <0.001          |           | -3.310            | <0.001          |
|           | +Fn:+Fi  | -1.483            | <0.001          |           | -1.539            | <0.001          |
| <b>24</b> | -Sn:-Si  | -1.897            | <0.001          | <b>72</b> | -4.512            | <0.001          |
|           | +Si:-Si  | -0.110            | 0.419           |           | -1.314            | 0.004           |
|           | +Gi:-Si  | 0.372             | 0.035           |           | -0.522            | 0.050           |
|           | +Fi:-Si  | -0.001            | 0.993           |           | -2.381            | <0.001          |
|           | +Sn:+Si  | -1.102            | <0.001          |           | -4.453            | <0.001          |
|           | +Gn:+Gi  | -1.772            | <0.001          |           | -2.625            | <0.001          |
|           | +Fn:+Fi  | -1.806            | <0.001          |           | -5.880            | <0.001          |
| <b>48</b> | -Sn:-Si  | -1.984            | <0.001          | <b>96</b> | 0.117             | 0.006           |
|           | +Si:-Si  | 0.002             | 0.981           |           | 5.025             | <0.001          |
|           | +Gi:-Si  | 0.284             | 0.058           |           | 3.757             | 0.002           |
|           | +Fi:-Si  | 0.255             | 0.020           |           | 6.755             | <0.001          |

Statistical significance of differences between the average values of each pairs for endogenous level of sugars. Statistically significant differences (*p*-value) was assumed at  $p < 0.05$ .

## Sucrose

| Time (h)  | Contrast | Value of Contrast | <i>p</i> -Value | Time (h)  | Value of Contrast | <i>p</i> -Value |
|-----------|----------|-------------------|-----------------|-----------|-------------------|-----------------|
| <b>0</b>  | 0n:0i    | -651.0            | 0.020           |           |                   |                 |
|           | +Sn:+Si  | -84.47            | 0.781           |           | 2010              | 0.010           |
|           | +Gn:+Gi  | 802.3             | 0.005           |           | 2123              | <0.001          |
|           | +Fn:+Fi  | 90.20             | 0.556           |           | 1635              | <0.001          |
| <b>24</b> | -Sn:-Si  | 272.5             | 0.015           | <b>72</b> | 53.10             | 0.008           |
|           | +Si:-Si  | 1385              | 0.006           |           | 398.4             | <0.001          |
|           | +Gi:-Si  | 962.4             | 0.002           |           | 278.7             | 0.002           |
|           | +Fi:-Si  | 1527              | <0.001          |           | 457.6             | <0.001          |
|           | +Sn:+Si  | 607.7             | 0.005           |           | 2141              | 0.009           |
|           | +Gn:+Gi  | 176               | 0.359           |           | 1255              | 0.015           |
|           | +Fn:+Fi  | 202.6             | 0.112           |           | 1761              | <0.001          |
| <b>48</b> | -Sn:-Si  | 216.9             | 0.007           | <b>96</b> | 10.07             | 0.562           |
|           | +Si:-Si  | 1699              | 0.003           |           | 242.9             | 0.017           |
|           | +Gi:-Si  | 1316              | 0.003           |           | 28.27             | <0.001          |
|           | +Fi:-Si  | 1862              | <0.001          |           | 12.57             | 0.008           |

## Glucose

| Time (h)  | Contrast | Value of Contrast | <i>p</i> -Value | Time (h)  | Value of Contrast | <i>p</i> -Value |
|-----------|----------|-------------------|-----------------|-----------|-------------------|-----------------|
| <b>0</b>  | 0n:0i    | -53.53            | <0.001          |           |                   |                 |
|           | +Sn:+Si  | -37.73            | 0.208           |           | 1668              | 0.007           |
|           | +Gn:+Gi  | 428.3             | 0.012           |           | 842.2             | 0.010           |
|           | +Fn:+Fi  | 77.27             | 0.104           |           | 1284              | 0.023           |
| <b>24</b> | -Sn:-Si  | -5.833            | 0.468           | <b>72</b> | 15.70             | <0.001          |
|           | +Si:-Si  | 200.8             | 0.001           |           | 309.1             | 0.002           |
|           | +Gi:-Si  | 328.0             | 0.014           |           | 644.9             | 0.016           |
|           | +Fi:-Si  | 203.1             | <0.001          |           | 168.6             | 0.002           |
|           | +Sn:+Si  | 196.0             | 0.011           |           | 1380              | <0.001          |
|           | +Gn:+Gi  | 10.27             | 0.845           |           | 502.8             | 0.021           |
|           | +Fn:+Fi  | -351.5            | 0.029           |           | 1659              | 0.013           |
| <b>48</b> | -Sn:-Si  | -2.133            | 0.170           | <b>96</b> | 16.50             | 0.003           |
|           | +Si:-Si  | 498.7             | 0.003           |           | 160.7             | 0.014           |
|           | +Gi:-Si  | 542.3             | 0.005           |           | 912.7             | <0.001          |
|           | +Fi:-Si  | 799.4             | 0.015           |           | 62.90             | <0.001          |

## Fructose

| Time (h)  | Contrast | Value of Contrast | <i>p</i> -Value | Time (h)  | Value of Contrast | <i>p</i> -Value |
|-----------|----------|-------------------|-----------------|-----------|-------------------|-----------------|
| <b>0</b>  | 0n:0i    | -391.4            | 0.003           |           |                   |                 |
|           | +Sn:+Si  | -626.5            | 0.006           |           | 2566              | 0.003           |
|           | +Gn:+Gi  | 953.1             | <0.001          |           | 2078              | 0.020           |
|           | +Fn:+Fi  | 1509              | <0.001          |           | 1703              | 0.001           |
| <b>24</b> | -Sn:-Si  | 164.5             | 0.020           | <b>72</b> | 11.43             | 0.046           |
|           | +Si:-Si  | 1092              | <0.001          |           | 981.5             | 0.008           |
|           | +Gi:-Si  | 387.9             | 0.003           |           | 347.1             | 0.015           |
|           | +Fi:-Si  | -14.53            | 0.514           |           | 1654              | <0.001          |
|           | +Sn:+Si  | 256.8             | 0.002           |           | 2417              | <0.001          |
|           | +Gn:+Gi  | -210.4            | 0.218           |           | 2422              | 0.017           |
|           | +Fn:+Fi  | -915.0            | 0.001           |           | -1804             | 0.011           |
| <b>48</b> | -Sn:-Si  | 20.60             | 0.005           | <b>96</b> | 18.07             | <0.001          |
|           | +Si:-Si  | 1665              | <0.001          |           | 247.7             | 0.016           |
|           | +Gi:-Si  | 1087              | 0.011           |           | 29.37             | <0.001          |
|           | +Fi:-Si  | 2662              | 0.001           |           | 4688              | 0.003           |

Statistical significance of differences between the average values of each pairs for  $\beta$ -glucosidase activity. Statistically significant differences (*p*-value) was assumed at  $p < 0.05$ .

 $\beta$ -Glucosidase

| Time (h)  | Contrast | Value of Contrast | <i>p</i> -Value | Time (h)  | Value of Contrast | <i>p</i> -Value |
|-----------|----------|-------------------|-----------------|-----------|-------------------|-----------------|
| <b>0</b>  | 0n:0i    | -0.1550           | 0.049           |           |                   |                 |
|           | +Sn:+Si  | 0.2533            | 0.180           |           | -1.393            | 0.177           |
|           | +Gn:+Gi  | -0.4433           | 0.201           |           | -4.530            | 0.003           |
|           | +Fn:+Fi  | 0.7667            | 0.090           |           | -1.773            | 0.047           |
| <b>24</b> | -Sn:-Si  | -2.400            | 0.008           | <b>72</b> | -8.940            | <0.001          |
|           | +Si:-Si  | 0.9267            | 0.060           |           | -3.770            | 0.016           |
|           | +Gi:-Si  | -0.4800           | 0.315           |           | -2.087            | 0.088           |
|           | +Fi:-Si  | -0.7633           | 0.170           |           | -7.280            | <0.001          |
|           | +Sn:+Si  | -1.350            | 0.021           |           | -7.613            | <0.001          |
|           | +Gn:+Gi  | -2.113            | 0.008           |           | -4.163            | 0.009           |
|           | +Fn:+Fi  | -1.217            | 0.155           |           | -2.823            | 0.036           |
| <b>48</b> | -Sn:-Si  | -2.800            | 0.001           | <b>96</b> | -10.44            | <0.001          |
|           | +Si:-Si  | -2.140            | 0.006           |           | -3.617            | 0.007           |
|           | +Gi:-Si  | -1.577            | 0.017           |           | -7.020            | <0.001          |
|           | +Fi:-Si  | -2.577            | 0.009           |           | -9.230            | <0.001          |

Statistical significance of differences between the average values of each pairs for superoxide anion radical generation. Statistically significant differences (*p*-value) was assumed at  $p < 0.05$ .

## Superoxide Anion Radical

| Time (h)  | Contrast | Value of Contrast | <i>p</i> -Value | Time (h)  | Value of Contrast | <i>p</i> -Value |
|-----------|----------|-------------------|-----------------|-----------|-------------------|-----------------|
| <b>0</b>  | 0n:0i    | 1.550             | <0.001          |           |                   |                 |
|           | +Sn:+Si  | -2.500            | <0.001          |           | -3.200            | <0.001          |
|           | +Gn:+Gi  | -4.300            | <0.001          |           | -2.133            | <0.001          |
|           | +Fn:+Fi  | -0.100            | 0.468           |           | -4.883            | <0.001          |
| <b>24</b> | -Sn:-Si  | -1.300            | 0.002           | <b>72</b> | -4.950            | <0.001          |
|           | +Si:-Si  | 2.700             | <0.001          |           | -1.450            | 0.002           |
|           | +Gi:-Si  | 3.733             | <0.001          |           | -1.250            | 0.003           |
|           | +Fi:-Si  | 0.700             | 0.009           |           | 0.5000            | 0.041           |
|           | +Sn:+Si  | -3.750            | <0.001          |           | -2.967            | <0.001          |
|           | +Gn:+Gi  | -4.467            | <0.001          |           | -2.217            | <0.001          |
|           | +Fn:+Fi  | -5.100            | <0.001          |           | -2.350            | <0.001          |
| <b>48</b> | -Sn:-Si  | -4.750            | <0.001          | <b>96</b> | -2.750            | <0.001          |
|           | +Si:-Si  | -0.5000           | 0.041           |           | 0.5667            | 0.038           |
|           | +Gi:-Si  | -0.1833           | 0.212           |           | -0.4333           | 0.050           |
|           | +Fi:-Si  | 0.4167            | 0.048           |           | -0.2000           | 0.335           |

Statistical significance of differences between the average values of each pairs for semiquinone radical concentration. Statistically significant differences (*p*-value) was assumed at  $p < 0.05$ .

## Concentration of Free Radicals

| Time (h)  | Contrast | Value of Contrast | <i>p</i> -Value | Time (h)  | Value of Contrast | <i>p</i> -Wartość |
|-----------|----------|-------------------|-----------------|-----------|-------------------|-------------------|
| <b>0</b>  | 0n:0i    | 0.025             |                 |           |                   |                   |
|           | +Sn:+Si  | -0.3867           | 0.006           |           | -1.310            | <0.001            |
|           | +Gn:+Gi  | -0.3867           | <0.001          |           | -1.660            | <0.001            |
|           | +Fn:+Fi  | -0.2067           | 0.232           |           | -1.057            | <0.001            |
| <b>24</b> | -Sn:-Si  | 0.0866            | 0.427           | <b>72</b> | -2.437            | 0.021             |
|           | +Si:-Si  | 0.1167            | 0.354           |           | -0.5600           | 0.263             |
|           | +Gi:-Si  | 0.2767            | 0.051           |           | -0.0566           | 0.890             |
|           | +Fi:-Si  | 0.1967            | 0.315           |           | -0.8900           | 0.133             |
|           | +Sn:+Si  | -0.1000           | 0.621           |           | -3.507            | 0.012             |
|           | +Gn:+Gi  | -0.0333           | 0.653           |           | -2.744            | <0.001            |
|           | +Fn:+Fi  | -0.0200           | 0.895           |           | -2.490            | 0.006             |
| <b>48</b> | -Sn:-Si  | -0.7000           | 0.051           | <b>96</b> | -5.950            | 0.010             |
|           | +Si:-Si  | -0.1300           | 0.623           |           | -2.027            | 0.051             |
|           | +Gi:-Si  | -0.1900           | 0.369           |           | 2.620             | 0.014             |
|           | +Fi:-Si  | -0.4333           | 0.111           |           | -3.023            | 0.017             |
